# Supplementary material for: RAG-mediated DNA double-strand breaks activate a cell type–specific checkpoint to inhibit pre–B cell receptor signals
Source: PubMed Central journal article supplement — J Exp Med. 2016 Feb 8;213(2):209–23. doi: 10.1084/jem.20151048 (PMC4749927; doi:10.1084/jem.20151048), 2016-02-08
Supplement: supp_jem.20151048_JEM_20151048_sm.pdf [file supp_jem.20151048_JEM_20151048_sm.pdf]

SUPPLEMENTAL MATERIAL

Bednarski et al., <http://www.jem.org/cgi/content/full/jem.20151048/DC1>

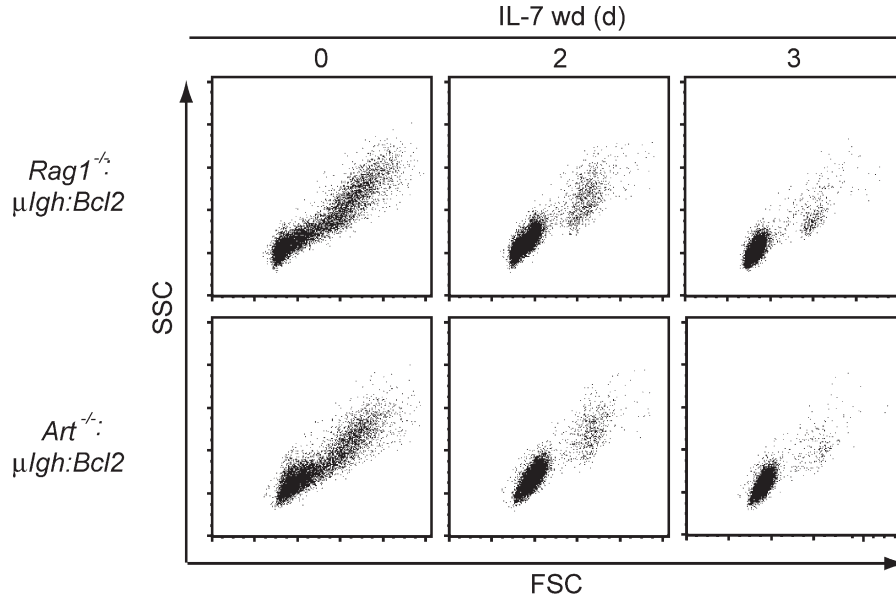

Figure S1. **Analysis of RAG DSB responses in pre-B cell cultures.** Bone marrow pre-B cells were cultured in the presence of IL-7 (0 d) and subsequently withdrawn from IL-7 (IL-7 wd) for the indicated days. Flow cytometric analysis of *Rag1*<sup>-/-</sup>;  $\mu$ IgH:Bcl2 and *Art*<sup>-/-</sup>;  $\mu$ IgH:Bcl2 pre-B cell cultures showing forward scatter (FSC, x axis) and side scatter (SSC, y axis).

Table S1, available as an Excel file, signals from RAG DSBs regulate the genetic program of small pre-B cells. Gene expression arrays were conducted on *Rag1*<sup>-/-</sup>;  $\mu$ IgH:Bcl2 and *Art*<sup>-/-</sup>;  $\mu$ IgH:Bcl2 pre-B cells in the presence of IL-7 (0 d) and 2 d after IL-7 withdrawal. Fold changes and p-values were calculated based on the mean of three cell lines for each genotype. Only those genes with a fold change of  $\geq 1.5$  and  $P \leq 0.05$  were considered for further analysis. Comparison of *Rag1*<sup>-/-</sup>;  $\mu$ IgH:Bcl2 pre-B cells in IL-7 (RAG\_0d) and after IL-7 withdrawal (RAG\_2d) identified genes changed upon transition from large (in IL-7) to small (2 d after IL-7 withdrawal) pre-B cells. *Rag1*<sup>-/-</sup>;  $\mu$ IgH:Bcl2 (RAG\_2d) and *Art*<sup>-/-</sup>;  $\mu$ IgH:Bcl2 (ART\_2d) were compared after IL-7 withdrawal to identify RAG DSB-dependent gene expression changes. Table includes all probes.

Table S2, available as an Excel file, NF- $\kappa$ B2 coordinates a cohort of gene expression changes in response to RAG DSBs. Gene expression arrays were conducted on *Art*<sup>-/-</sup>;  $\mu$ IgH:Bcl2 (ART) and *Art*<sup>-/-</sup>; *Nfkb2*<sup>-/-</sup>;  $\mu$ IgH:Bcl2 (ART:Nfkb2) small pre-B cells 2 d after IL-7 withdrawal. Data were analyzed as described in Fig. 3 A and Table S1. Table includes all probes.

Table S3, available as an Excel file, shows primer sequences used for RT-PCR and ChIP-qPCR.
